# Supplementary material for: Time-varying transmission dynamics of Novel Coronavirus Pneumonia in China
Source: bioRxiv or medRxiv preprint supplement (doi:10.1101/2020.01.25.919787), 2020-02-13
Supplement: Supplementary file [file media-1.pdf]

# Supplementary Material

## Transmission dynamics of 2019 novel coronavirus (2019-nCoV)

Tao Liu\*, Jianxiong Hu\*, Min Kang\*, Lifeng Lin\*, Haojie Zhong\*, Jianpeng Xiao\*, Guanhao He, Tie Song, Qiong Huang, Zuhua Rong, Aiping Deng, Weilin Zeng, Xiaohua Tan, Siqing Zeng, Zhihua Zhu, Jiansen Li, Donghua Wan, Jing Lu, Huihong Deng, Jianfeng He†, Wenjun Ma†

Guangdong Provincial Institute of Public Health, Guangdong Provincial Center for Disease Control and Prevention (T Liu PhD, J Hu MS, J Xiao PhD, G He PhD, Z Rong MS, W Zeng MS, S Zeng MD, Z Zhu MS, D Wan MS, J Lu PhD, W Ma PhD)

Guangdong Provincial Center for Disease Control and Prevention (M Kang PhD, L Lin PhD, H Zhong MD, T Song MPH, Q Huang PhD, A Deng MPH, X Tan BS, J Li MPH., H Deng MD, J He MD,)

\*These authors contributed equally to this work

†These authors contributed equally to this work

Correspondence to:

Dr. Jianfeng He, Guangdong Provincial Center for Disease Control and Prevention, Guangzhou 511430, China

1460035443@qq.com

or

Dr. Wenjun Ma, Guangdong Provincial Institute of Public Health, Guangdong Provincial Center for Disease Control and Prevention, Guangzhou 511430, China

mawj@gdiph.org.cn

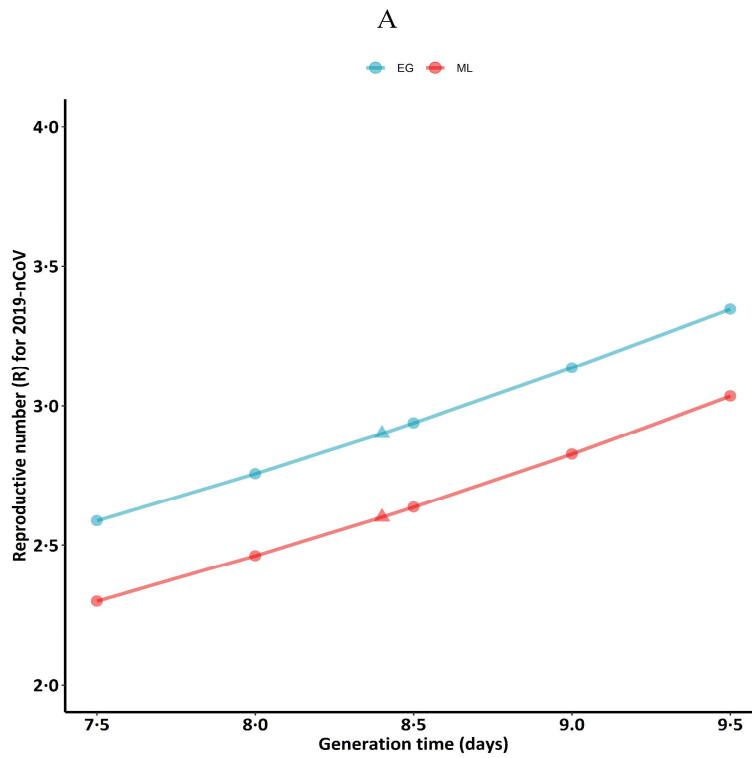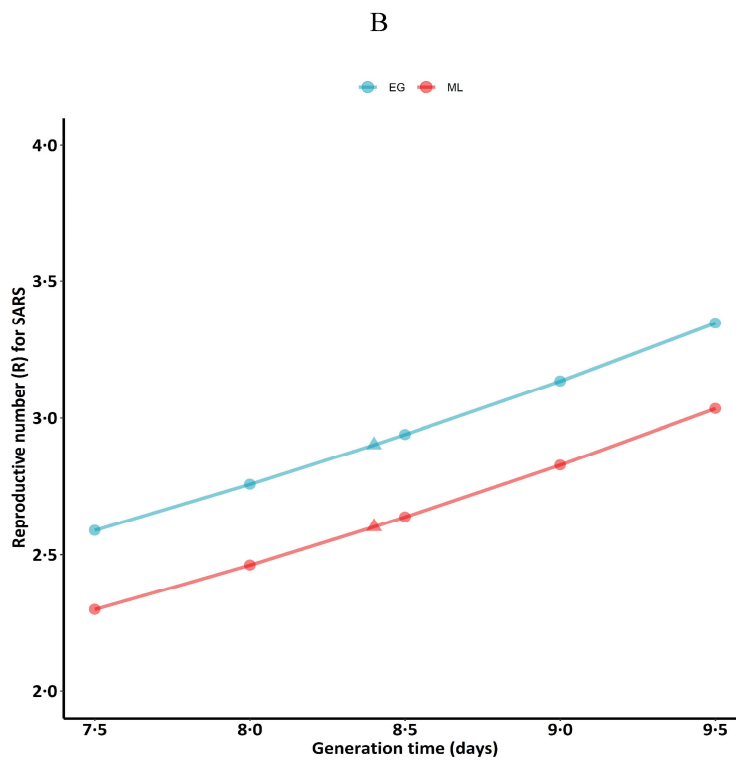

Figure S1. Sensitivity analyses on the impacts of GT on the R values for 2019-nCoV and SARS

Chart A: Sensitivity analyses on the impacts of GT on the R values for 2019-nCoV

Chart B: Sensitivity analyses on the impacts of GT on the R values for SARS

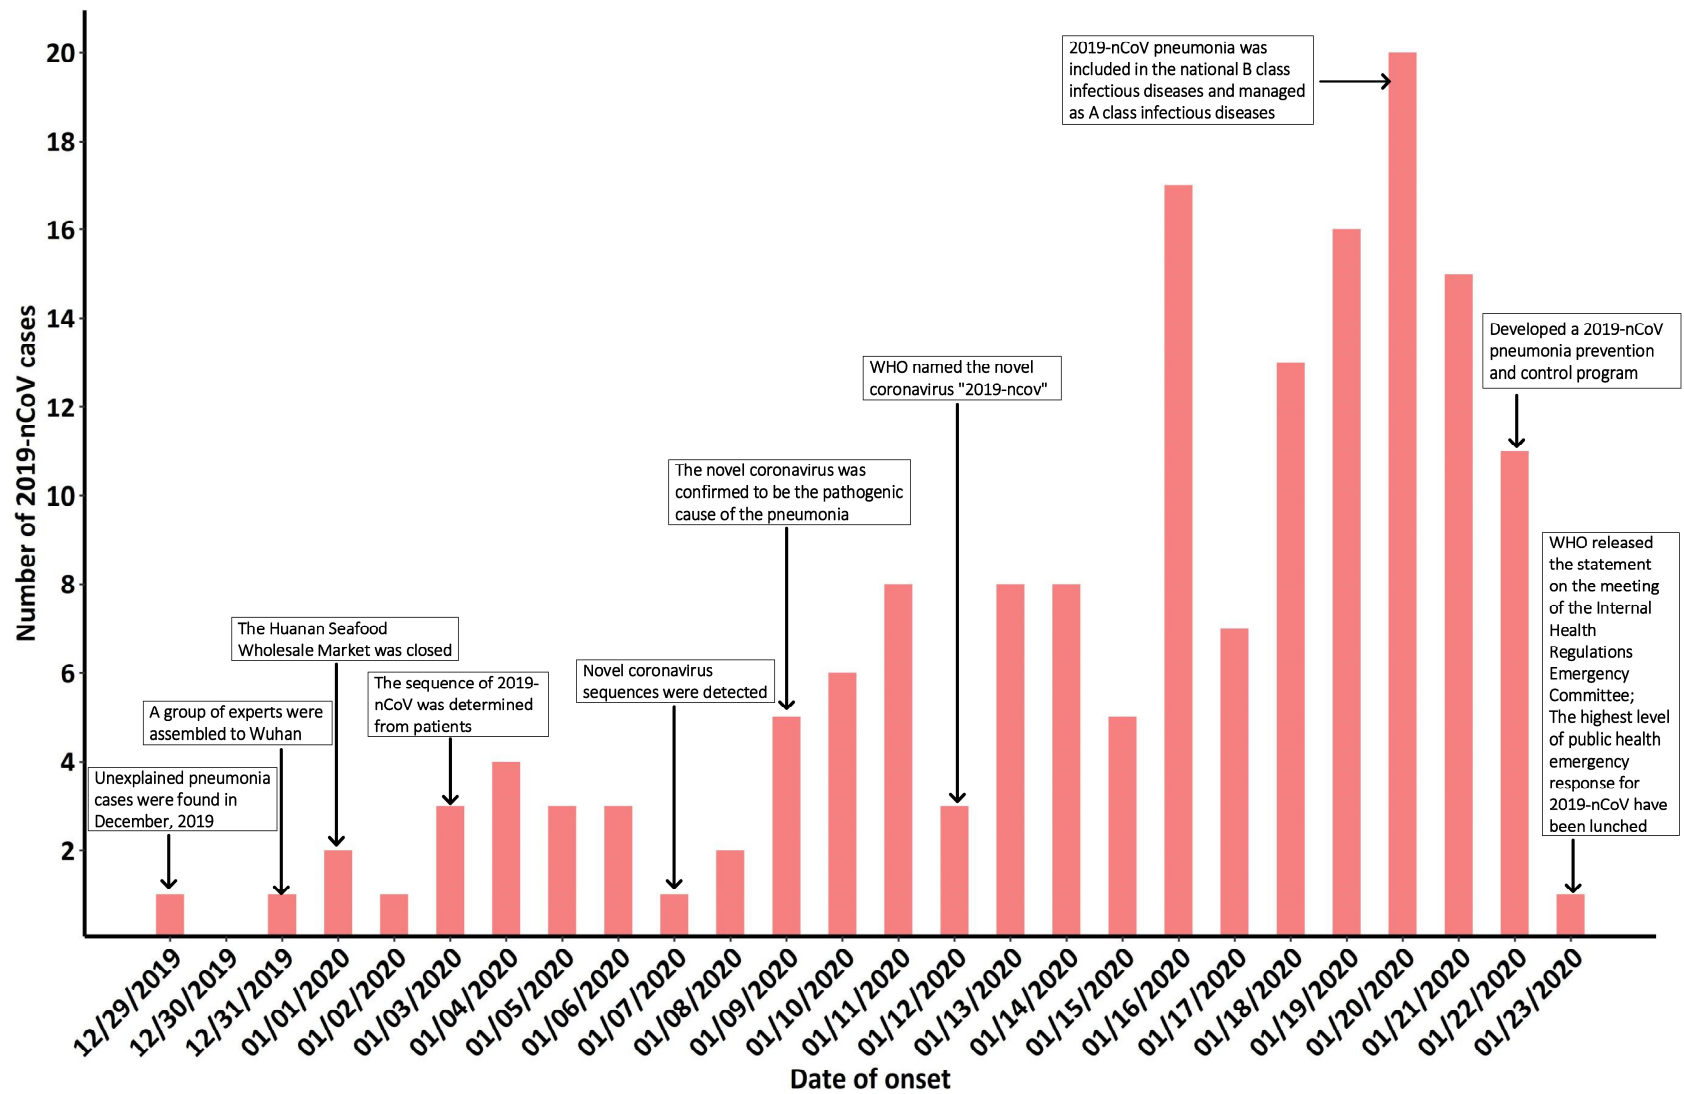

Figure S2. Epidemic curve for 2019-nCoV outbreak and timeline of major control measure from December 29, 2019 to January 23, 2020
